# Supplementary material
Source: PubMed Central journal article supplement (PMC2199264)
Supplement: HALMS166901-supplement.pdf [file HALMS166901-supplement.pdf]

**Supplementary Table 1. *ASMT* primers used in this study**

| Exon              | Exon size (bp)      | PCR fragment size (bp) | Primers                                                                 | Annealing (°C) |
|-------------------|---------------------|------------------------|-------------------------------------------------------------------------|----------------|
| <b>Sequencing</b> |                     |                        |                                                                         |                |
| 1A                | 78                  | 875                    | ASMT1AF: GAGCGATTCTTCTGCCTCAGC<br>ASMT1AR: TCTGCGCACACTCCCAGGTG         | 67             |
| 1B/C              | 136<br>(coding 69)  | 491                    | ASMT1BF: GAGGCAGGAGAATCGCTTGAA<br>ASMT1BR: CAACAATGGAACGTGAGTGTG        | 65             |
| 2                 | 175                 | 552                    | ASMT2F: TGGTGCAATCTCATTGACTCTG<br>ASMT2R: GGGTTCATGCCATTCTCTG           | 58             |
| 3                 | 130                 | 950                    | ASMT3F: CAGCTGTACAAGGCAAGAGGA<br>ASMT3R: CTTTCACCTCCTCCACTGCCA          | 55             |
| 4                 | 69                  | 283                    | ASMT4F: GCCTGGGCTACAGAGCTGAAA<br>ASMT4R: CTCCTGGGTTGTGCCATTTG           | 55             |
| 5                 | 119                 | 331                    | ASMT5F: CCTGTGGGGTATAGCTCCGTTC<br>ASMT5R: CGCACATGTCAAAGCATCAGA         | 64             |
| 6                 | 84                  | 342                    | ASMT6F: AGCTTGCAGTGAGCGGAAATC<br>ASMT6R: GCACCCATCGACTCGTCATTT          | 64             |
| 7                 | 141                 | 352                    | ASMT7F: TGGGTTGGACCTTCATGAGT<br>ASMT7R: GTGTTTCCGGGAGTGAGAGGA           | 64             |
| 8                 | 123                 | 338                    | ASMT8F: AGCCTGGAAGACCTGGGAAAG<br>ASMT8R: CCTGTGGGATGATTTCAGTGC          | 64             |
| 9                 | 279<br>(coding 212) | 506                    | ASMT9F: GGTGCCCTGACTGTCTCTGA<br>ASMT9R: CCATCAGCGTGGTCCTCAGTA           | 64             |
| <b>Expression</b> |                     |                        |                                                                         |                |
| E 4-6             |                     | 223                    | ASMTsplice4F: CCAGTACCTGGAGACGTTTGG<br>ASMTexp6R1: TCCTTGCGATAGTTTGCTGA | 55             |

All PCRs were performed with Qiagen HotStarTaq at the following temperatures: 15 min at 95°C, 35 cycles of: 30 s at 95°C, 30 s at annealing temperature, 0.5-1 min at 72°C, followed by a final extension step of 10 min at 72°C. One 28 bp insertion/deletion located 194 bp upstream from exon 1A was used for the association study. bp, base pairs.

**Supplementary Table 2. Stratification of the ASD and control populations used for the case control study.**

| Variations                        | Allele              | ASD  | Control | Chi2 | df | p value |
|-----------------------------------|---------------------|------|---------|------|----|---------|
| <b>SNPs</b>                       |                     |      |         |      |    |         |
| RS2289311                         | A                   | 0.66 | 0.66    | 0.06 | 1  | 0.8     |
| RS4782053                         | G                   | 0.67 | 0.69    | 0.4  | 1  | 0.5     |
| RS1921361                         | C                   | 0.64 | 0.62    | 0.1  | 1  | 0.7     |
| <b>Alu</b>                        |                     |      |         |      |    |         |
| Ya5NBC27                          | Empty               | 0.71 | 0.76    | 3.4  | 1  | 0.07    |
| Ya5NBC51                          | Empty               | 0.57 | 0.58    | 0.07 | 1  | 0.8     |
| YaNBC102                          | Empty               | 0.64 | 0.64    | 0.1  | 1  | 0.8     |
| YaNBC109                          | Full                | 0.60 | 0.56    | 1.7  | 1  | 0.2     |
| YbNBC65                           | Empty               | 0.51 | 0.54    | 0.8  | 1  | 0.4     |
| <b>Microsatellite<sup>1</sup></b> |                     |      |         |      |    |         |
| Androgen receptor                 | Multiple alleles    |      |         | 15   | 19 | 0.7     |
| <b>MtDNA<sup>2</sup></b>          |                     |      |         |      |    |         |
| HVR1                              | Multiple Haplotypes |      |         | 1.6  | 3  | 0.6     |

<sup>1</sup>Mothers of children with ASD and affected girls were compared to control females. <sup>2</sup>The test concerns the haplotype matching the control reference sequence and those containing the variations 16126, 16223 located in the hypervariable region 1 (HVR1) of the mtDNA. df, degrees of freedom.

Supplementary Table 3. Clinical features of patients with rare variants of the *ASMT* gene

| Family and patient | Location and nucleotide change | Protein change      | ASMT activity deficit | Inheritance | Sex | Age at last evaluation (years) | Ethnic origin    | Diagnosis                     | Cognitive level | Language                                                                   | Attention/ Hyperactivity/ Sleep                                                                                                 | Seizures | Family history                                                                                                                                                                |
|--------------------|--------------------------------|---------------------|-----------------------|-------------|-----|--------------------------------|------------------|-------------------------------|-----------------|----------------------------------------------------------------------------|---------------------------------------------------------------------------------------------------------------------------------|----------|-------------------------------------------------------------------------------------------------------------------------------------------------------------------------------|
| <b>ASD 1</b>       |                                |                     |                       |             |     |                                |                  |                               |                 |                                                                            |                                                                                                                                 |          |                                                                                                                                                                               |
| Patient 1          | IVS5+2T>C                      | Frameshift mutation | yes                   | Maternal    | M   | 25                             | European         | autism                        | mild MR         | language delay (started to speak at 5y)                                    | ADHD symptoms present until the age of 12 y. Abnormal sleep pattern, falls asleep very late, nocturnal awakenings.              | —        | The father has depression, the mother is healthy but she has a particular sleep organization, sleeping only when she's very tired, at any time, otherwise sleeping few hours. |
| <b>ASD 2</b>       |                                |                     |                       |             |     |                                |                  |                               |                 |                                                                            |                                                                                                                                 |          |                                                                                                                                                                               |
| Patient 1          | —                              | —                   | nd                    | —           | M   | 12                             | North Africa     | autism                        | mild MR         | no language delay                                                          | Hyperactivity during childhood; no longer present at 12 y                                                                       | —        | Three affected children from two fathers; the mother and the father of the two younger sibs are healthy, no information about the father of the first child                   |
| Patient 2          | IVS5+2T>C                      | Frameshift mutation | nd                    | Paternal    | M   | 7                              | North Africa     | autism                        | severe MR       | non verbal                                                                 | Severe hyperactivity during childhood; still present at 7 y                                                                     | +        |                                                                                                                                                                               |
| Patient 3          | IVS5+2T>C                      | Frameshift mutation | nd                    | Paternal    | M   | 4                              | North Africa     | autism                        | severe MR       | non verbal                                                                 | Hyperactive in the evening                                                                                                      | +        |                                                                                                                                                                               |
| <b>ASD 3</b>       |                                |                     |                       |             |     |                                |                  |                               |                 |                                                                            |                                                                                                                                 |          |                                                                                                                                                                               |
| Patient 1          | exon 1B, C51A                  | N17K                | nd                    | Maternal    | M   | 9                              | China            | autism + ADHD combined type   | low normal      | first words 14 m<br>sentences 36 m                                         | ADHD; no sleep problems                                                                                                         | —        | Only child. Negative family history.                                                                                                                                          |
| <b>ASD 4</b>       |                                |                     |                       |             |     |                                |                  |                               |                 |                                                                            |                                                                                                                                 |          |                                                                                                                                                                               |
| Patient 1          | exon 2, A241G                  | K81E                | nd                    | Maternal    | M   | 8                              | African-American | autism                        | mild MR         | first words 19 m,<br>sentences 40 m                                        | Slept very little during the first years but his sleep is now normal. Marked hyperactivity and difficulty maintaining attention | —        | Father: negative medical and psychiatric history; mother: depressive episode during first pregnancy                                                                           |
| <b>ASD 5</b>       |                                |                     |                       |             |     |                                |                  |                               |                 |                                                                            |                                                                                                                                 |          |                                                                                                                                                                               |
| Patient 1          | exon 9, G917C                  | G306A               | nd                    | Maternal    | M   | 12                             | European         | autism                        | mild MR         | first words 14 m,<br>sentences at 36 m,<br>followed by language regression | Motor hyperactivity; very active during night                                                                                   | —        | The parents have no medical or psychiatric history.                                                                                                                           |
| Patient 2          | exon 9, G917C                  | G306A               | nd                    | Maternal    | M   | 9                              | European         | autism                        | severe MR       | language development stopped at 15 m; very limited language at 9 y         | Motor hyperactivity                                                                                                             | —        |                                                                                                                                                                               |
| <b>ASD 6</b>       |                                |                     |                       |             |     |                                |                  |                               |                 |                                                                            |                                                                                                                                 |          |                                                                                                                                                                               |
| Patient1           | exon 9, C976T                  | L326F               | yes                   | Maternal    | M   | 11                             | North Africa     | autism                        | severe MR       | first words 18 m,<br>never acquired any sentences                          | Motor hyperactivity; normal sleep.                                                                                              | —        | The parents have no medical or psychiatric history                                                                                                                            |
| <b>ASD 7</b>       |                                |                     |                       |             |     |                                |                  |                               |                 |                                                                            |                                                                                                                                 |          |                                                                                                                                                                               |
| Patient 1          | exon 9, C976T                  | L326F               | nd                    | Maternal    | M   | 6                              | European         | Asperger + ADHD combined type | normal          | first words 24 m,<br>sentences 36 m                                        | ADHD, no sleep problems.                                                                                                        | —        | The parents have no medical or psychiatric history                                                                                                                            |

MR, mental retardation; nd, not determined

**Supplementary Table 4. TDT of the polymorphisms located in *ASMT* promoter B in 278 families with ASD using FBAT and HBAT.**

|                   | freq | Additive model |     |      |        |       |             | Dominant model |     |      |        |       |             |  |
|-------------------|------|----------------|-----|------|--------|-------|-------------|----------------|-----|------|--------|-------|-------------|--|
|                   |      | fam#           | S   | E(S) | Var(S) | Z     | P           | fam#           | S   | E(S) | Var(S) | Z     | P           |  |
| <b>SNPs</b>       |      |                |     |      |        |       |             |                |     |      |        |       |             |  |
| rs44446909        |      |                |     |      |        |       |             |                |     |      |        |       |             |  |
| A                 | 0.25 | 104            | 81  | 84   | 55     | -0.4  | 0.68        | 104            | 66  | 68   | 35     | -0.4  | 0.7         |  |
| G                 | 0.75 | 104            | 163 | 160  | 55     | 0.4   | 0.68        | 39             | 31  | 30   | 13     | 0.2   | 0.8         |  |
| rs5989681         |      |                |     |      |        |       |             |                |     |      |        |       |             |  |
| C                 | 0.3  | 110            | 93  | 96   | 62     | -0.4  | 0.66        | 114            | 78  | 79   | 40     | -0.12 | 0.9         |  |
| G                 | 0.7  | 110            | 171 | 167  | 62     | 0.4   | 0.66        | 55             | 46  | 43   | 15     | 0.7   | 0.48        |  |
| <b>P1BC</b>       |      |                |     |      |        |       |             |                |     |      |        |       |             |  |
| A                 | 0.12 | 67             | 38  | 45   | 29     | -1.29 | 0.2         | 73             | 44  | 48   | 28     | -0.8  | 0.42        |  |
| G                 | 0.88 | 67             | 128 | 121  | 29     | 1.29  | 0.2         | 12             | 13  | 10   | 1.3    | 2.4   | <b>0.02</b> |  |
| rs6644635         |      |                |     |      |        |       |             |                |     |      |        |       |             |  |
| C                 | 0.64 | 119            | 206 | 193  | 73     | 1.54  | 0.12        | 68             | 66  | 57   | 18     | 2     | <b>0.04</b> |  |
| T                 | 0.36 | 119            | 104 | 117  | 73     | -1.54 | 0.12        | 128            | 90  | 95   | 50     | -0.7  | 0.51        |  |
| <b>Haplotypes</b> |      |                |     |      |        |       |             |                |     |      |        |       |             |  |
| H1 GGGC           | 0.34 | 116            | 197 | 183  | 52     | 1.97  | <b>0.05</b> | 115            | 164 | 150  | 34     | 2.3   | <b>0.02</b> |  |
| H2 GGGT           | 0.24 | 105            | 133 | 137  | 52     | -0.47 | 0.63        | 105            | 121 | 120  | 44     | 0.2   | 0.9         |  |
| H3 ACGC           | 0.23 | 102            | 114 | 115  | 50     | -0.21 | 0.83        | 92             | 101 | 100  | 33     | 0.07  | 0.9         |  |
| H4 GGAT           | 0.11 | 63             | 55  | 57   | 25     | -0.42 | 0.67        | 62             | 54  | 56   | 23     | -0.3  | 0.7         |  |
| H5 GCGC           | 0.05 | 38             | 26  | 28   | 12     | -0.69 | 0.49        | 38             | 26  | 28   | 12     | -0.7  | 0.5         |  |

Freq, frequency; fam#, number of informative families; S, observed transmission; E(S), expected transmission; Var(S) Variance of the transmission observed. P values below 0.05 are indicated in bold.
